# Supplementary material
Source: PubMed Central journal article supplement (PMC3359874)
Supplement: NIHMS359634-supplement-Supplementary_Material.pdf [file NIHMS359634-supplement-Supplementary_Material.pdf]

**Table 1. Baseline characteristics of participants by diabetes status at trial entry and follow-up, and by treatment group—chlorthalidone, amlodipine, and lisinopril (CVD Cohort)**

|                                                | Chlorthalidone |             |                          | Amlodipine  |             |                          | Lisinopril  |             |                          | Total       |                        |                          |
|------------------------------------------------|----------------|-------------|--------------------------|-------------|-------------|--------------------------|-------------|-------------|--------------------------|-------------|------------------------|--------------------------|
|                                                | DM BL          | Inc DM      | No DM                    | DM BL       | Inc DM      | No DM                    | DM BL       | Inc DM      | No DM                    | DM BL       | No DM                  |                          |
| N                                              | 5669           | 346         | 4282                     | 3422        | 153         | 2578                     | 3334        | 114         | 2520                     | 12,425      | 613                    | 9380                     |
| Age, y-mean(sd)                                | 66.4(7.3)      | 66.1(7.4)   | 66.7(7.5) <sup>†</sup>   | 66.3(7.3)   | 65.4(7.0)   | 66.9(7.5) <sup>†</sup>   | 66.5(7.4)   | 66.2(7.5)   | 66.7(7.5)                | 66.4(7.3)   | 65.9(7.3)              | 66.8(7.5) <sup>†</sup>   |
| Women-n(%)                                     | 2844(50.2)     | 115(33.2)   | 1838(42.9) <sup>†</sup>  | 1694(49.5)  | 67(43.8)    | 1121(43.5) <sup>†</sup>  | 1628(48.8)  | 34(29.8)    | 1041(41.3) <sup>†</sup>  | 6166(49.6)  | 215(35.2) <sup>*</sup> | 4000(42.6) <sup>†</sup>  |
| Black-n(%)                                     | 2211(39.0)     | 106(30.6)   | 1202(28.1) <sup>†</sup>  | 1345(39.3)  | 48(31.4)    | 749(29.1) <sup>†</sup>   | 1310(39.3)  | 32(28.1)    | 728(28.9) <sup>†</sup>   | 4866(39.2)  | 186(30.3)              | 2679(28.6) <sup>†</sup>  |
| Current smoker-n(%)                            | 756(13.3)      | 91(26.3)    | 1149(26.8) <sup>†</sup>  | 457(13.4)   | 40(26.1)    | 659(25.6) <sup>†</sup>   | 457(13.7)   | 26(22.8)    | 652(25.9) <sup>†</sup>   | 1670(13.4)  | 157(25.6)              | 2460(26.2) <sup>†</sup>  |
| CHD-n(%)                                       | 1140(20.3)     | 116(33.7)   | 1267(29.8) <sup>†</sup>  | 615(18.2)   | 43(28.1)    | 750(29.3) <sup>†</sup>   | 646(19.5)   | 35(30.7)    | 725(29.1) <sup>†</sup>   | 2401(19.5)  | 194(31.8)              | 2742(29.5) <sup>†</sup>  |
| ASCVD <sup>§</sup> -n(%)                       | 2027(35.8)     | 219(63.3)   | 2617(61.1) <sup>†</sup>  | 1160(33.9)  | 99(64.7)    | 1564(60.7) <sup>†</sup>  | 1202(36.1)  | 74(64.9)    | 1535(60.9) <sup>†</sup>  | 4389(35.3)  | 392(64.0)              | 5716(60.9) <sup>†</sup>  |
| LVH <sup>  </sup> by ECG-n(%)                  | 500(10.5)      | 35(11.3)    | 538(13.7) <sup>*</sup>   | 305(10.7)   | 18(12.7)    | 355(15.1) <sup>*</sup>   | 285(10.3)   | 16(15.5)    | 360(15.7) <sup>†</sup>   | 1090(10.5)  | 69 (12.4)              | 1253(14.6) <sup>†</sup>  |
| Blood pressure, mm Hg-mean(sd)                 |                |             |                          |             |             |                          |             |             |                          |             |                        |                          |
| SBP                                            | 146.4(15.6)    | 147.3(15.5) | 145.6(15.7)              | 146.4(15.6) | 148.5(15.3) | 145.6(16.0)              | 146.7(15.1) | 147.8(15.1) | 145.4(15.7) <sup>†</sup> | 146.5(15.4) | 147.7(15.4)            | 145.5(15.8) <sup>†</sup> |
| DBP                                            | 83.0(9.9)      | 84.3(10.7)  | 84.5(10.0) <sup>†</sup>  | 82.7(10.1)  | 85.2(9.4)   | 84.4(10.1) <sup>†</sup>  | 83.0(9.9)   | 86.0(9.6)   | 84.4(10.0) <sup>†</sup>  | 82.9(10.0)  | 84.7(10.2)             | 84.5(10.0) <sup>†</sup>  |
| Body mass index, kg/m <sup>2</sup> – mean (sd) | 31.1 (6.4)     | 31.1 (6.3)  | 28.6 (5.6) <sup>†</sup>  | 31.3 (6.2)  | 29.8 (5.4)  | 28.6 (5.6) <sup>†</sup>  | 31.2 (6.2)  | 29.8 (5.2)  | 28.6 (5.8) <sup>†</sup>  | 31.2 (6.3)  | 30.5 (5.9)             | 28.6 (5.7) <sup>†</sup>  |
| Cholesterol, mg/dL-mean(sd)                    |                |             |                          |             |             |                          |             |             |                          |             |                        |                          |
| Total                                          | 215.6(45.8)    | 215.4(39.3) | 216.8(41.2)              | 216.8(45.3) | 217.6(37.5) | 215.3(42.2)              | 215.2(44.4) | 216.0(42.4) | 215.2(39.7)              | 215.8(45.2) | 216.0(39.4)            | 216.0(41.1)              |
| HDL                                            | 44.8(13.2)     | 43.0(13.6)  | 48.3(15.8) <sup>†</sup>  | 45.2(14.0)  | 42.0(12.0)  | 48.7(14.9) <sup>†</sup>  | 44.6(13.0)  | 42.4(11.6)  | 47.7(15.2) <sup>†</sup>  | 44.8(13.4)  | 42.6(12.9)             | 48.3(15.4) <sup>†</sup>  |
| LDL                                            | 134.2(38.3)    | 136.0(34.6) | 137.5(35.9) <sup>†</sup> | 134.8(37.7) | 137.8(33.0) | 136.2(36.2) <sup>*</sup> | 134.0(36.6) | 136.6(36.0) | 137.4(35.6) <sup>†</sup> | 134.3(37.7) | 136.6(34.4)            | 137.1(35.9) <sup>†</sup> |
| Fasting glucose, mg/dL-mean(sd)                | 169.1(70.0)    | 105.4(12.7) | 91.8(10.2) <sup>†</sup>  | 167.2(67.2) | 105.8(12.4) | 91.9(10.5) <sup>†</sup>  | 168.3(65.3) | 105.5(13.3) | 92.6(10.8) <sup>†</sup>  | 168.4(67.8) | 105.5(12.7)            | 92.0(10.5) <sup>†</sup>  |

\* p&lt;.05 comparing across diabetes subgroups.

† p&lt;.01 comparing across diabetes subgroups.

§ Atherosclerotic cardiovascular disease

|| Left ventricular hypertrophy: tall R wave on ECG with or without ST segment depression or T wave inversion

Inc DM= incident diabetes; DM=diabetes; SBP=systolic blood pressure; DBP=diastolic blood pressure

**Table2. Mortality outcomes by treatment by diabetes status at 2 years among those with no diabetes at baseline**

|                            | Inc DM                    |                              | No DM                     |                              | Other Cause<br><2 Years<br>n(%) | Unknown DM status          |                           |                              |
|----------------------------|---------------------------|------------------------------|---------------------------|------------------------------|---------------------------------|----------------------------|---------------------------|------------------------------|
|                            | Death ≥2<br>Years<br>n(%) | No Event<br>≥2 Years<br>n(%) | Death ≥2<br>Years<br>n(%) | No Event<br>≥2 Years<br>n(%) |                                 | Death <<br>2 Years<br>n(%) | Death ≥2<br>Years<br>n(%) | No Event<br>≥2 Years<br>n(%) |
| <b>All-Cause Mortality</b> |                           |                              |                           |                              |                                 |                            |                           |                              |
| <b>Total</b>               | 182(29.7)                 | 431(70.3)                    | 2477(26.4)                | 6903(73.6)                   |                                 | 730(7.5)                   | 2885(29.4)                | 6186(63.1)                   |
| <b>Chlorthalidone</b>      | 98(28.3)                  | 248(71.7)                    | 1142(26.7)                | 3140(73.3)                   |                                 | 316(7.1)                   | 1312(29.6)                | 2799(63.2)                   |
| <b>Amlodipine</b>          | 47(30.7)                  | 106(69.3)                    | 671(26.0)                 | 1907(74.0)                   |                                 | 198(7.6)                   | 781(30.1)                 | 1616(62.3)                   |
| <b>Lisinopril</b>          | 37(32.5)                  | 77(67.5)                     | 664(26.4)                 | 1856(73.7)                   |                                 | 216(7.8)                   | 792(28.5)                 | 1771(63.7)                   |
|                            |                           | P = .67*                     |                           | P=.84*                       |                                 |                            |                           | P=.59*                       |
| <b>CVD Mortality</b>       |                           |                              |                           |                              |                                 |                            |                           |                              |
| <b>Total</b>               | 86(14.0)                  | 527(86.0)                    | 1063(11.3)                | 8317(88.7)                   | 373(3.8)                        | 357(3.6)                   | 1228(12.5)                | 7843(80.0)                   |
| <b>Chlorthalidone</b>      | 42(12.1)                  | 304(87.9)                    | 479(11.2)                 | 3803(88.8)                   | 168(3.8)                        | 148(3.3)                   | 575(13.0)                 | 3536(79.9)                   |
| <b>Amlodipine</b>          | 26(17.0)                  | 127(83.0)                    | 305(11.8)                 | 2273(88.2)                   | 94(3.6)                         | 104(4.0)                   | 307(11.8)                 | 2090(80.5)                   |
| <b>Lisinopril</b>          | 18(15.8)                  | 96(84.2)                     | 279(11.1)                 | 2241(88.9)                   | 111(4.0)                        | 105(3.8)                   | 346(12.5)                 | 2217(79.8)                   |
|                            |                           | P=.30*                       |                           | P=.84*                       |                                 |                            |                           | P=.60*                       |
| <b>Non-CVD Mortality</b>   |                           |                              |                           |                              |                                 |                            |                           |                              |
| <b>Total</b>               | 92(15.0)                  | 521(85.0)                    | 1354(14.4)                | 8026(85.6)                   | 393(4.0)                        | 337(3.4)                   | 1516(15.5)                | 7555(77.1)                   |
| <b>Chlorthalidone</b>      | 55(15.9)                  | 291(84.1)                    | 634(14.8)                 | 3648(85.2)                   | 162(3.7)                        | 154(3.5)                   | 680(15.4)                 | 3431(77.5)                   |
| <b>Amlodipine</b>          | 18(11.8)                  | 135(88.2)                    | 347(13.5)                 | 2231(86.5)                   | 116(4.5)                        | 82(3.2)                    | 430(16.6)                 | 1967(75.8)                   |
| <b>Lisinopril</b>          | 19(16.7)                  | 95(83.3)                     | 373(14.8)                 | 2147(85.2)                   | 115(4.1)                        | 101(3.6)                   | 406(14.6)                 | 2157(77.6)                   |
|                            |                           | P=.42*                       |                           | P=.26*                       |                                 |                            |                           | P=.25*                       |

\*Contingency table analysis (3 x 2 or 3 x 4) of Treatment by outcome [Chi-square (2 or 6 df) or Fisher's exact]

Inc DM=incident diabetes; DM=diabetes

Table 3. Combined mortality and morbidity outcomes by treatment by diabetes status at 2 years among those with no diabetes at baseline

|                                 | Inc DM                     |                            |                              | No DM                      |                            |                              | Died or Lost<br><2 Years<br>n(%) | Unknown                    |                            |                              |
|---------------------------------|----------------------------|----------------------------|------------------------------|----------------------------|----------------------------|------------------------------|----------------------------------|----------------------------|----------------------------|------------------------------|
|                                 | Event <<br>2 Years<br>n(%) | Event ≥ 2<br>Years<br>n(%) | No Event<br>≥2 Years<br>n(%) | Event <<br>2 Years<br>n(%) | Event ≥ 2<br>Years<br>n(%) | No Event<br>≥2 Years<br>n(%) |                                  | Event < 2<br>Years<br>n(%) | Event ≥ 2<br>Years<br>n(%) | No Event<br>≥2 Years<br>n(%) |
| <b>Non-fatal MI + Fatal CHD</b> |                            |                            |                              |                            |                            |                              |                                  |                            |                            |                              |
| <b>Total</b>                    | 6(1.6)                     | 63(17.3)                   | 296(81.1)                    | 128(2.2)                   | 655(11.0)                  | 5148(86.8)                   | 572(8.6)                         | 137(2.1)                   | 721(10.8)                  | 5252(78.6)                   |
| <b>Chlorthalidone</b>           | 4(1.9)                     | 29(14.0)                   | 174(84.1)                    | 61(2.3)                    | 292(10.8)                  | 2364(87.0)                   | 248(8.2)                         | 58(1.9)                    | 333(11.0)                  | 2379(78.8)                   |
| <b>Amlodipine</b>               | 0(0.0)                     | 19(19.4)                   | 79(80.6)                     | 36(2.2)                    | 193(11.8)                  | 1407(86.0)                   | 148(8.4)                         | 36(2.0)                    | 190(10.7)                  | 1398(78.9)                   |
| <b>Lisinopril</b>               | 2(3.3)                     | 15(25.0)                   | 43(71.7)                     | 31(2.0)                    | 170(10.8)                  | 1377(87.3)                   | 176(9.3)                         | 43(2.3)                    | 198(10.5)                  | 1475(78.0)                   |
|                                 |                            |                            | P = .09*                     |                            |                            | P = .77*                     |                                  |                            |                            | P = .82*                     |
| <b>CVD</b>                      |                            |                            |                              |                            |                            |                              |                                  |                            |                            |                              |
| <b>Total</b>                    | 14(3.8)                    | 112(30.7)                  | 239(65.5)                    | 214(3.6)                   | 1434(24.2)                 | 4283(72.2)                   | 572(8.6)                         | 307(4.6)                   | 1616(24.2)                 | 4187(62.7)                   |
| <b>Chlorthalidone</b>           | 9(4.4)                     | 61(29.5)                   | 137(66.2)                    | 95(3.5)                    | 663(24.4)                  | 1959(72.1)                   | 248(8.2)                         | 126(4.2)                   | 742(24.6)                  | 1902(63.0)                   |
| <b>Amlodipine</b>               | 1(1.0)                     | 31(31.6)                   | 66(67.4)                     | 59(3.6)                    | 413(25.2)                  | 1164(71.2)                   | 148(8.4)                         | 84(4.7)                    | 426(24.0)                  | 1114(62.9)                   |
| <b>Lisinopril</b>               | 4(6.7)                     | 20(33.3)                   | 36(60.0)                     | 60(3.8)                    | 358(22.7)                  | 1160(73.5)                   | 176(9.3)                         | 97(5.1)                    | 448(23.7)                  | 1171(61.9)                   |
|                                 |                            |                            | P = .37*                     |                            |                            | P = .53*                     |                                  |                            |                            | P = .57*                     |
| <b>Stroke</b>                   |                            |                            |                              |                            |                            |                              |                                  |                            |                            |                              |
| <b>Total</b>                    | 5(1.4)                     | 38(10.4)                   | 322(88.2)                    | 56(0.9)                    | 458(7.7)                   | 5417(91.3)                   | 572(8.6)                         | 97(1.5)                    | 500(7.5)                   | 5513(82.5)                   |
| <b>Chlorthalidone</b>           | 4(1.9)                     | 17(8.2)                    | 186(89.9)                    | 22(0.8)                    | 210(7.7)                   | 2485(91.5)                   | 248(8.2)                         | 39(1.3)                    | 232(7.7)                   | 2499(82.8)                   |
| <b>Amlodipine</b>               | 1(1.0)                     | 15(15.3)                   | 82(83.7)                     | 13(0.8)                    | 128(7.8)                   | 1495(91.4)                   | 148(8.4)                         | 27(1.5)                    | 125(7.1)                   | 1472(83.1)                   |
| <b>Lisinopril</b>               | 0(0.0)                     | 6(10.0)                    | 54(90.0)                     | 21(1.3)                    | 120(7.6)                   | 1437(91.1)                   | 176(9.3)                         | 31(1.6)                    | 143(7.6)                   | 1542(81.5)                   |
|                                 |                            |                            | P = .33*                     |                            |                            | P = .48*                     |                                  |                            |                            | P = .72*                     |
| <b>Heart Failure</b>            |                            |                            |                              |                            |                            |                              |                                  |                            |                            |                              |
| <b>Total</b>                    | 4(1.1)                     | 38(10.4)                   | 323(88.5)                    | 52(0.9)                    | 498(8.4)                   | 5381(90.7)                   | 572(8.6)                         | 110(1.7)                   | 569(8.5)                   | 5431(81.3)                   |
| <b>Chlorthalidone</b>           | 1(0.5)                     | 27(13.0)                   | 179(86.5)                    | 17(0.6)                    | 230(8.5)                   | 2470(90.9)                   | 248(8.2)                         | 46(1.5)                    | 260(8.6)                   | 2464(81.6)                   |
| <b>Amlodipine</b>               | 0(0.0)                     | 6(6.1)                     | 92(93.9)                     | 18(1.1)                    | 148(9.1)                   | 1470(89.9)                   | 148(8.4)                         | 30(1.7)                    | 162(9.1)                   | 1432(80.8)                   |
| <b>Lisinopril</b>               | 3(5.0)                     | 5(8.3)                     | 52(86.7)                     | 17(1.1)                    | 120(7.6)                   | 1441(91.3)                   | 176(9.3)                         | 34(1.8)                    | 147(7.8)                   | 1535(81.1)                   |
|                                 |                            |                            | P = .02*, †                  |                            |                            | P = .21*                     |                                  |                            |                            | P = .61*                     |
| <b>ESRD</b>                     |                            |                            |                              |                            |                            |                              |                                  |                            |                            |                              |
| <b>Total</b>                    | 0(0.0)                     | 10(1.6)                    | 603(98.4)                    | 1(0.01)                    | 91(1.0)                    | 9288(99.0)                   | 730(7.5)                         | 13(0.1)                    | 148(1.5)                   | 8910(90.9)                   |
| <b>Chlorthalidone</b>           | 0(0.0)                     | 8(2.3)                     | 338(97.7)                    | 0(0.0)                     | 40(0.9)                    | 4242(99.1)                   | 316(7.1)                         | 10(0.2)                    | 73(1.7)                    | 4028(91.0)                   |
| <b>Amlodipine</b>               | 0(0.0)                     | 0(0.0)                     | 153(100.0)                   | 0(0.0)                     | 28(1.1)                    | 2550(98.9)                   | 198(7.6)                         | 2(0.1)                     | 42(1.6)                    | 2353(90.7)                   |
| <b>Lisinopril</b>               | 0(0.0)                     | 2(1.8)                     | 112(98.3)                    | 1(0.04)                    | 23(0.9)                    | 2496(99.1)                   | 216(7.8)                         | 1(0.04)                    | 33(1.2)                    | 2529(91.0)                   |
|                                 |                            |                            | P = .16*                     |                            |                            | P = .61*                     |                                  |                            |                            | P = .16*                     |

\*Contingency table analysis (3 x 3 or 3 x 4) of Treatment by outcome [Chi-square (4 or 6 df) or Fisher's exact]

† P = .17 for 3 x 2 post two years ‡

Inc DM = incident diabetes; DM = diabetes; ESRD = end stage renal disease

Figure 1. Adjusted Kaplan-Meier plots by treatment group and diabetes status—chlorthalidone and amlodipine

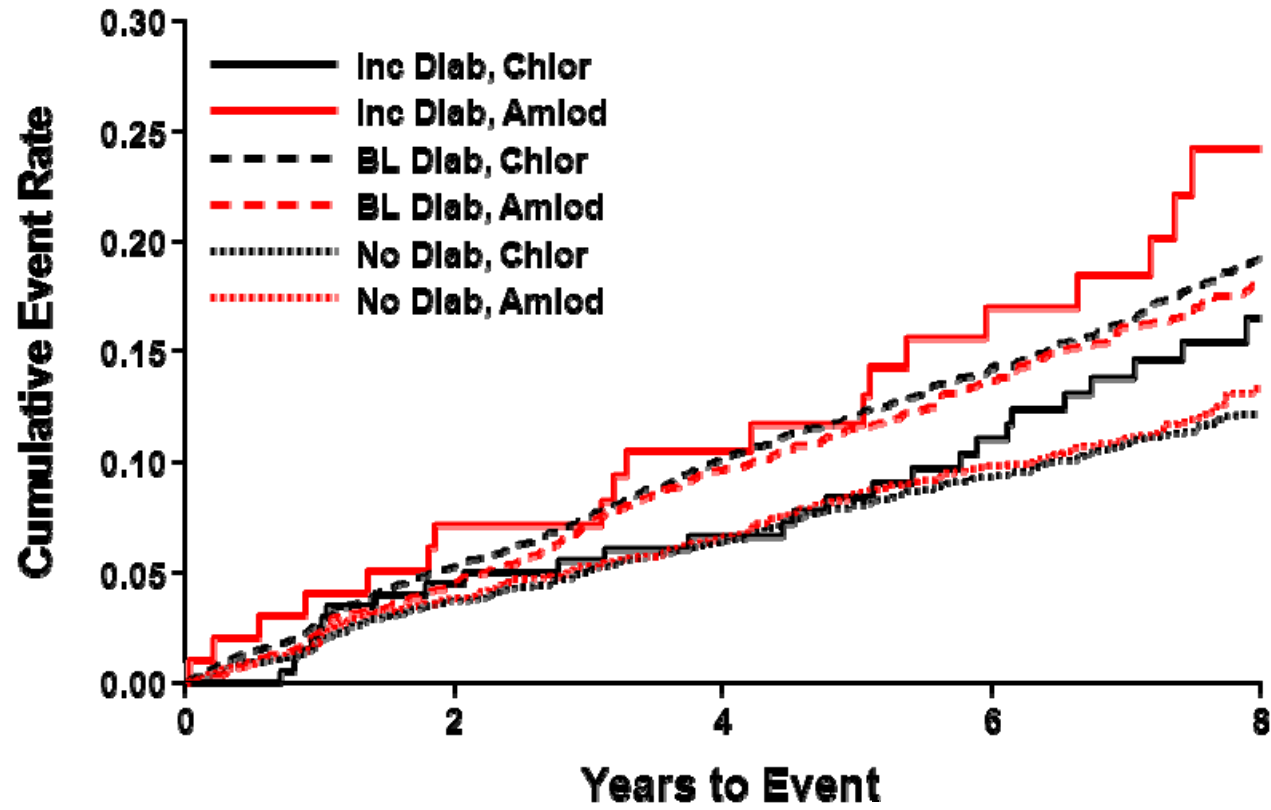

Figure 2. Adjusted Kaplan-Meier plots by treatment group and diabetes status—chlorthalidone and lisinopril

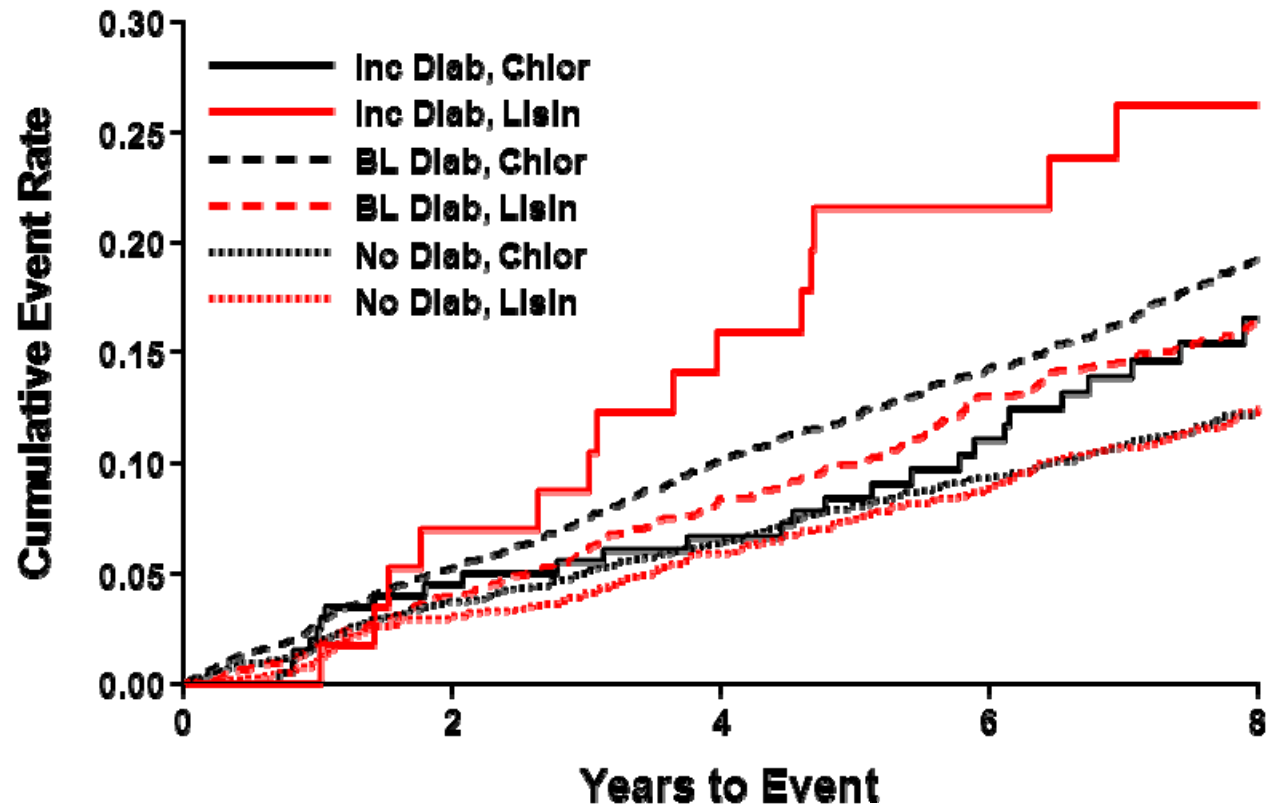

Figure 3. Forest plots – chlorthalidone, amlodipine, lisinopril – comparisons of diabetes groups

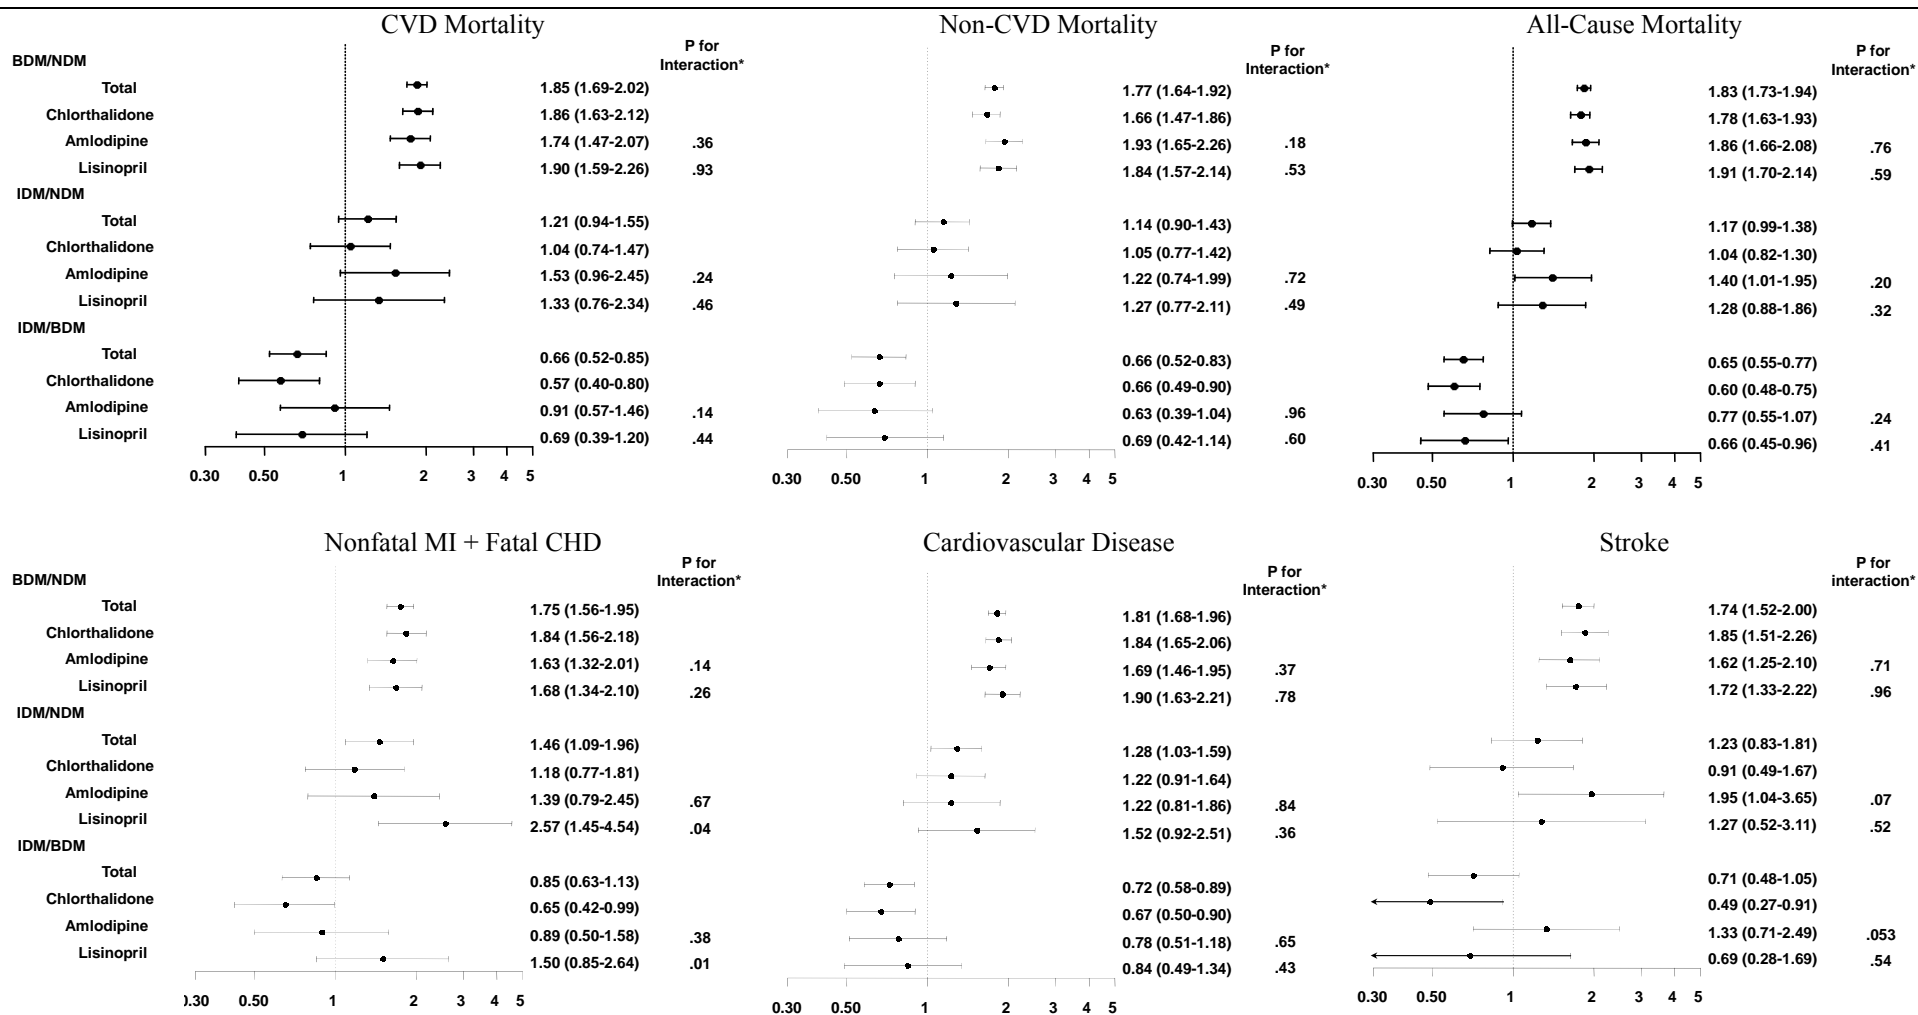

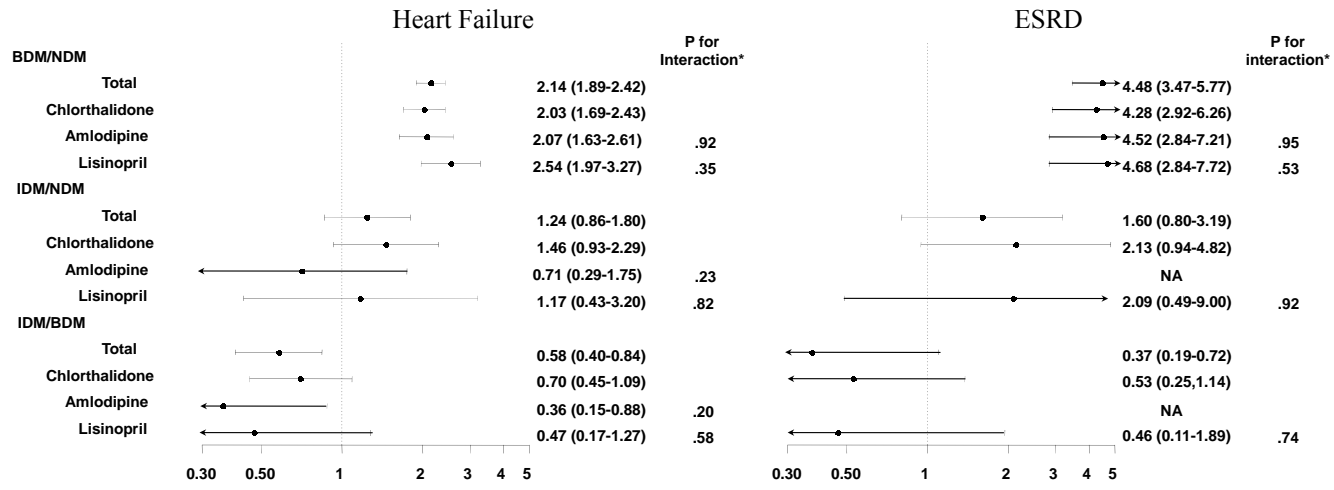

**Figure legends:**

**Figure 1: Adjusted Kaplan-Meier plots by treatment group and diabetes status—chlorthalidone and amlodipine**

**Figure 2. Adjusted Kaplan-Meier plots by treatment group and diabetes status—chlorthalidone and lisinopril**

**Figure 3. Forest plots – chlorthalidone, amlodipine, lisinopril – comparisons of diabetes groups**
